# Supplementary material for: Antithrombotic strategies for preventing graft failure in coronary artery bypass graft
Source: Springer Nature journal article supplement (doi:10.1007/s11239-023-02940-5), 2024-03-16
Supplement: MOESM1 [file 26868008]

1 **Antithrombotic Strategies for Preventing Graft Failure in Coronary Artery Bypass Graft**

2 Maria Sara Mauro, Simone Finocchiaro, Dario Calderone, Carla Rochira, Federica Agnello,  
3 Lorenzo Scalia, Davide Capodanno.

4

5 Division of Cardiology, Azienda Ospedaliero Universitaria Policlinico “G. Rodolico-San Marco”,  
6 University of Catania, Catania, Italy.

7

8 **Address for correspondence:**

9 Davide Capodanno

10 AOU Policlinico “G. Rodolico – San Marco”, University of Catania

11 Via Santa Sofia, 78 - Catania, Italy

12 Phone number: +39 0953781172

13 E-mail: dcapodanno@unict.it

14

15 **ORCID**

16 Maria Sara Mauro: 0000-0001-9432-9314

17 Simone Finocchiaro: 0000-0002-3974-3878

18 Dario Calderone

19 Carla Rochira: 0000-0002-3903-6401

20 Federica Agnello

21 Lorenzo Scalia

22 Davide Capodanno: 0000-0002-5156-7723

23 **Abstract**

24 Coronary artery bypass graft (CABG) procedures face challenges related to graft failure, driven by  
25 factors such as acute thrombosis, neointimal hyperplasia, and atherosclerotic plaque formation.  
26 Despite extensive efforts over four decades, the optimal antithrombotic strategy to prevent graft  
27 occlusion while minimizing bleeding risks remains uncertain, relying heavily on expert opinions  
28 rather than definitive guidelines. To address this uncertainty, we conducted a review of randomized  
29 clinical trials and meta-analyses of antithrombotic therapy for patients with CABG. These studies  
30 examined various antithrombotic regimens in CABG such as single antiplatelet therapy (aspirin or  
31 P2Y<sub>12</sub> inhibitors), dual antiplatelet therapy, and anticoagulation therapy. We evaluated outcomes  
32 including the patency of grafts, major adverse cardiovascular events, and bleeding complications  
33 and also explored future perspectives to enhance long-term outcomes for CABG patients. Early  
34 studies established aspirin as a key component of antithrombotic pharmacotherapy after CABG.  
35 Subsequent randomized controlled trials focused on adding a P2Y<sub>12</sub> inhibitor (such as clopidogrel,  
36 ticagrelor, or prasugrel) to aspirin, yielding mixed results. By consolidating the evidence and  
37 providing a comprehensive analysis, this article aims to inform clinical decision-making and guide  
38 the selection of antithrombotic strategies after CABG.

39

40 **Key words**

41 Coronary artery bypass grafting; antithrombotic therapy; graft failure; coronary artery disease.

42

- 43 **Abbreviations and acronyms**
- 44 **ACS** - acute coronary syndromes
- 45 **CABG** - Coronary artery bypass graft
- 46 **DAPT** - Dual antiplatelet therapy
- 47 **DOAC** - Direct oral anticoagulant
- 48 **MACE** - major adverse cardiovascular events
- 49 **MI** - myocardial infarction
- 50 **SVG** - saphenous vein grafts

## 51 INTRODUCTION

52 Coronary artery bypass grafting (CABG) is widely accepted as a treatment option for patients with  
53 left main or multivessel coronary artery disease [1]. However, after CABG, patients remain at risk  
54 of coronary events due to the progression of their underlying atherosclerosis or the failure of the  
55 arterial conduits or saphenous vein grafts (SVG) used during the procedure [2]. Despite efforts to  
56 prioritize total arterial revascularization, SVG continue to be the predominant choice, and the  
57 incidence of SVG failure remains high, with reported rates ranging from 3% to 12% [3].

58 Early failure of arterial or saphenous grafts is typically attributed to acute thrombosis, while  
59 long-term failure results from thrombosis, the development of atheromatic plaques, or neointimal  
60 hyperplasia [4]. The occlusion of grafts due to thrombosis is influenced by various factors,  
61 including alterations in local blood hemodynamics and changes to the vessel wall [4, 5]. These  
62 processes trigger increased platelet activation, underscoring the essential role of antithrombotic  
63 therapy in any strategy aimed at preserving graft patency and preventing ischemic complications  
64 [6]. However, the optimal approach to antithrombotic management is more uncertain after a CABG  
65 procedure compared to percutaneous coronary intervention, where the evidence is more robust.  
66 Current guidelines offer suggestions on the choice and duration of antiplatelet therapy after CABG,  
67 but the evidence supporting these recommendations is limited and primarily based on expert  
68 opinions. Nevertheless, recent studies have emerged that offer new insights in this space [7, 8].

69 This article aims to provide an update on the use of antithrombotic therapy for the purpose of  
70 preventing graft failure after a CABG procedure.

71

## 72 MECHANISMS OF GRAFT FAILURE

73 Graft failure results from multiple underlying pathophysiological processes (**Figure 1**). Early graft  
74 failure (i.e., within hours to less than a month) is generally attributed to acute thrombosis. During  
75 the harvesting process, mechanical forces and ischemia-reperfusion injury result in damage to the

76 endothelial cells and smooth muscle cells [9, 10]. The resulting reduced levels of prostacyclin and  
77 nitric oxide activate leukocytes and platelets, which mediate thrombus formation by adhering to the  
78 extracellular matrix and producing thrombogenic factors such as platelet-derived growth factor,  
79 transforming growth factor  $\beta$ , fibrinogen, fibronectin, and von Willebrand factor [11].

80 Between one month and one-year post-CABG, the leading cause of SVG failure is intimal  
81 hyperplasia. These cases are often characterized by concentric and widespread atherosclerosis,  
82 which lacks a fibrous cap and is more susceptible to rupture due to rapid progression [12].  
83 Conversely, graft failure beyond 12 months is more frequently characterized by the accumulation of  
84 foam cells and the growth of a necrotic core with cholesterol deposits. This event typically occurs  
85 two to five years after the procedure, starting with intermediate lesions. The expansion of the  
86 necrotic core due to intraplaque hemorrhage from neoangiogenic vessels leads to plaque rupture and  
87 thrombus formation. Arterial grafts are known to have a more resistant atheroma plaque capsule  
88 compared to SVGs, making the latter more susceptible to plaque rupture and thrombosis [12].

89 Systemic risk factors, such as diabetes mellitus and aging, play a crucial role in determining the  
90 success of CABG by promoting a pro-atherogenic phenotype. A lower individual response to  
91 antithrombotic therapy after CABG in patients with high platelet reactivity can also increase the risk  
92 of early or late graft failure [13].

93

## 94 **EVIDENCE REVIEW**

95 **Figure 2** shows the timeline of key randomized clinical trials of antiplatelet therapy after CABG.

96

### 97 **Single antiplatelet therapy**

98 Early placebo-controlled studies published in the eighties tested warfarin, indobufen, aspirin at  
99 different doses and the combination of high-dose aspirin and dipyridamole, with mixed results [14-

100 23]. In the largest of these studies (n=555) all the aspirin-based regimens improved graft patency at  
101 60 days from surgery [19]. These results were consistent in a smaller trial (n=231) where an aspirin  
102 dose of 324 mg daily, given within one hour after CABG, resulted in a significant reduction in SVG  
103 occlusion at 1 week that was sustained at one year [18]. Following these studies, aspirin became a  
104 pillar of secondary prevention in this setting [24, 25]. However, the response to aspirin can be  
105 highly variable among CABG patients [26, 27]. Therefore, alternative antiplatelet agents, including  
106 the P2Y<sub>12</sub> receptor inhibitors clopidogrel and ticagrelor, have been investigated (**Table 1**).

107 **Clopidogrel** - Clopidogrel irreversibly inhibits the platelet response through mechanisms  
108 mediated by adenosine diphosphate. A subgroup analysis of patients undergoing cardiac surgery in  
109 the CAPRIE trial (including but not limited to patients undergoing CABG) suggested that  
110 clopidogrel might be better than aspirin in the context of long-term management [28, 29]. On the  
111 other hand, several pharmacodynamic studies failed to demonstrate a relevant early effect of  
112 clopidogrel in comparison with other single antiplatelet agents. For example, a study of 62 patients  
113 compared different doses of clopidogrel (i.e., 50, 75, or 100 mg) with ticlopidine 250 mg given  
114 twice daily, and found that all the three doses effectively inhibited platelet activity ex-vivo and  
115 prolonged bleeding time at day 28, but did not significantly reduce platelet aggregation at day 9  
116 [30]. Another small study of 54 patients compared the effect of two doses of aspirin (100 mg or 325  
117 mg) with clopidogrel 75 mg, and found no significant benefit of clopidogrel on platelet aggregation  
118 during the first five postoperative days [31]. As such, clopidogrel monotherapy is not currently  
119 recommended over aspirin to prevent the risk of early graft failure.

120 **Ticagrelor** - Ticagrelor reversibly binds to the platelet P2Y<sub>12</sub> receptor and provides strong and  
121 rapid inhibition of adenosine diphosphate -induced platelet aggregation. The TiCAB trial compared  
122 ticagrelor monotherapy (90 mg, twice daily) with aspirin monotherapy (100 mg/day) during the first  
123 year after arterial and/or SVG implantation [32]. The trial was discontinued prematurely due to  
124 withdrawal of funding support from the sponsor, at a time when 1859 out of 3850 planned patients

125 were randomized. No significant differences were observed between ticagrelor and aspirin in terms  
126 of major adverse cardiac events (MACE) at 12 months after CABG. However, these results should  
127 be interpreted with caution as the study was underpowered. The TARGET trial was another  
128 relatively small study (n=250) comparing ticagrelor and aspirin after CABG [33]. The primary  
129 outcome was occlusion of SVG as determined by computed tomography coronary angiography at  
130 12 months. There was no significant difference between the two groups [33], which was also  
131 confirmed at two years in 142 patients undergoing another computed tomography coronary  
132 angiography assessment [34]. In aggregate, similarly to clopidogrel, there is no evidence to  
133 recommend ticagrelor as single antiplatelet therapy after CABG.

134

### 135 **Dual antiplatelet therapy**

136 Randomized clinical trials of DAPT for the prevention of graft occlusion are summarized below and  
137 in **Table 2**.

138 **DAPT with aspirin and clopidogrel** - Several studies compared the combination of clopidogrel  
139 and aspirin versus aspirin monotherapy, with small study samples and mixed findings. Four studies  
140 have reported improved graft patency [35-38]. The largest of these studies was the CRYSSA trial  
141 (n=300), which showed a significantly lower risk of graft occlusion at 12 months [37]. Conversely,  
142 four other studies presented negative findings [39-42].

143 No trials of DAPT with clopidogrel and aspirin exist that were powered for hard clinical  
144 endpoints. Data from observational studies and post-hoc analyses of randomized trials designed for  
145 other purposes are available, but likely fraught by confounding bias. If anything, these studies were  
146 consistent in showing no benefit on mortality with clopidogrel in addition to aspirin. In the 2,072  
147 patients with acute coronary syndromes (ACS) who received CABG in the CURE trial, DAPT  
148 reduced the risk of cardiovascular death, myocardial infarction, or stroke by 11%, but increased the  
149 risk of hemorrhagic complications by 30% [43]. Conversely, in a large retrospective registry from

150 China (n=18,069), CABG patients with DAPT had a lower incidence of all-cause death, stroke,  
151 myocardial infarction, or repeat revascularization at six months and had no differences in bleeding  
152 events [44]. In a sub-analysis of the ROOBY trial, DAPT increased early death (i.e., within 30  
153 days) and did not improve the risk of death at long-term [45]. Additionally, in a study including  
154 aspirin-resistant patients, DAPT did not result in reduced death at six months [46]. These results  
155 were consistent with a post hoc analysis of the FREEDOM trial, where no differences in death,  
156 adverse ischemic events and bleeding was observed at five years among patients with type II  
157 diabetes mellitus undergoing CABG [47].

158 **DAPT with aspirin and ticagrelor** – The TAP-CABG trial (n=70), which was terminated  
159 prematurely because of slow recruitment, evaluated the incidence of arterial and venous graft  
160 patency at 3 months after DAPT with ticagrelor and aspirin versus aspirin alone. The primary  
161 endpoint was slightly improved with DAPT (p=0.044), but the difference was not significant in  
162 analyses stratified by individual grafts [48]. The larger DACAB trial randomized 500 patients to  
163 DAPT, ticagrelor alone or aspirin alone [49]. DAPT significantly improved the rate of SVG patency  
164 at 12 months compared to aspirin (risk difference, 12.2; 95% confidence interval [CI], 5.2% to  
165 19.2%; p<0.001). This effect was consistent in a post hoc analysis restricted to patients with ACS,  
166 who represented 67% of the entire population. The incidence of ischemic and bleeding events was  
167 low, which precludes the interpretation of clinical endpoints. A 5-year follow-up extension study of  
168 DACAB, where more events will be accrued, is ongoing (NCT03987373).

169 At variance with DACAB, the POPULAR-CABG trial (n=499) showed no significant difference  
170 in one-year SVG patency with aspirin and ticagrelor compared to aspirin alone [50]. The different  
171 results of DACAB and POPULAR-CABG have two contributing explanations. Firstly, in DACAB,  
172 a higher proportion of patients underwent CABG for ACS than in POPULAR-CABG (i.e., two  
173 thirds versus one third). ACS is known as the population that benefits the most from a ticagrelor-  
174 based DAPT. Secondly, the use of cardiopulmonary bypass was markedly lower in DACAB (25%)

175 than in POPULAR-CABG (95%). The impact of this difference on graft patency is unclear. Two  
176 recent meta-analyses suggested that the antiplatelet regimens that include ticagrelor are associated  
177 with improved clinical outcomes and increased graft patency [51, 52]. However, the findings of  
178 these meta-analyses were mixed regarding the risk of clinically important bleeding. In view of the  
179 conflicting results of the available studies, the efficacy of DAPT with ticagrelor and aspirin in  
180 improving the patency of SVGs remains undefined.

181 **DAPT with aspirin and prasugrel** - A recent study compared DAPT with prasugrel and aspirin  
182 versus aspirin alone [53], but was prematurely stopped due to slow enrolment after randomizing  
183 only 84 patients. The primary endpoint, the incidence of optical coherence tomography-detected  
184 SVG thrombus at 12 months, was observed in approximately one-third of the patients, without a  
185 significant difference between the two treatment groups. Additionally, there were no significant  
186 differences in angiographic SVG failure, the incidence of MACE, or severe bleeding. Two meta-  
187 analyses suggested that DAPT with prasugrel reduces the risk of SVG failure, mortality and MACE  
188 when compared with single antiplatelet therapy, albeit at the expense of an increased risk of major  
189 bleeding [54, 55].

190 **Comparisons of DAPT strategies** - Although the evidence in this area is not robust, some post-  
191 hoc analyses of studies comparing different DAPT strategies are informative. DAPT with aspirin  
192 and clopidogrel was compared to DAPT with aspirin and ticagrelor in the PLATO trial, which  
193 included 1,261 patients with ACS undergoing CABG [56]. The results in this subgroup showed a  
194 significant reduction in the composite outcomes of all-cause death, myocardial infarction, or stroke  
195 at 12 months with aspirin and ticagrelor, and similar rates of hemorrhagic events. Additionally, a  
196 pharmacodynamic study conducted in 140 patients undergoing CABG demonstrated that the onset  
197 of action was faster and the inhibition of platelet aggregation was higher with ticagrelor and aspirin  
198 than with clopidogrel and aspirin, with no difference in bleeding or MACE [57]. Another small trial

199 (n=147) reported similar rates of SVG patency at 1-year with ticagrelor-based and clopidogrel-  
200 based DAPT [58].

201 The only available data comparing DAPT with prasugrel and aspirin and DAPT with clopidogrel  
202 and aspirin comes from a subset analysis of the TRITON-TIMI 38 trial, which included 346 patients  
203 with ACS undergoing CABG [59]. Despite an increase in bleeding and surgical re-exploration,  
204 prasugrel-based DAPT was associated with a lower rate of death within 30 days after CABG. It is  
205 possible that the greater degree of platelet inhibition provided by prasugrel may have contributed to  
206 both the increased non-fatal bleeding and the reduced risk of fatal cardiac events and mortality. This  
207 evidence is mostly derived from sub-analyses of trials with non-stratified randomization, and  
208 therefore is not sufficient to draw definitive conclusions.

209 A recent Chinese trial (n=152) compared DAPT with indobufen and clopidogrel to DAPT with  
210 aspirin and clopidogrel and found similar patency rates of SVG and arterial grafts at 12 months  
211 [60]. This trial also showed a similar rate of MACE between the two groups and a lower incidence  
212 of gastrointestinal adverse events in the indobufen group. Based on these findings, indobufen might  
213 be considered in DAPT combinations if aspirin is not an option.

214

## 215 **Anticoagulant therapy**

216 Early studies investigated the effectiveness of various anticoagulants in preventing graft occlusion  
217 after CABG.

218 **Vitamin K antagonists** – In 1993, a meta-analysis of 17 trials concluded that warfarin  
219 significantly reduces the risk of graft occlusion compared to placebo, similar to aspirin [61]. No  
220 difference between vitamin K antagonists (VKA; i.e., acenocoumarol or phenprocoumon) and  
221 aspirin was demonstrated on SVG patency at one year in a trial of 948 patients [62].

222 In the landmark Post-CABG (Post-Coronary Artery Bypass Graft) trial, 1,351 patients on aspirin  
223 were randomized to low-dose warfarin (e.g., dual-pathway inhibition) or placebo [63]. While no  
224 significant effect was observed on progression of SVG disease, there were a 35% reduction in  
225 mortality (p=0.008) and a 31% reduction of death or nonfatal myocardial infarction (p=0.003) with  
226 warfarin and aspirin at 7.5 years [64]. The mechanism leading to such effects remained unexplained  
227 and play of chance cannot be ruled out. Indeed, only 11% of patients were on VKA during the  
228 extended follow-up.

229 **Direct oral anticoagulant** - More recently, there has been interest in evaluating a strategy of  
230 combining a direct oral anticoagulant (DOAC) with an antiplatelet agent. The rationale for this  
231 strategy is to reduce the degree of platelet activation throughout synergistic inhibition of  
232 thromboxane A<sub>2</sub> production by aspirin and inhibition of thrombin and fibrin formation by the  
233 DOAC [65]. Due to lack of dedicated trials, whether this strategy is suitable for secondary  
234 prevention after CABG is unclear [66, 67].

235 In a prespecified substudy of the COMPASS trial, 1,448 patients were randomized within 4 to 14  
236 days after CABG to rivaroxaban 2.5 mg twice daily plus aspirin 100 mg daily, rivaroxaban 5 mg  
237 twice daily, or aspirin 100 mg daily [68]. At an average of 1.13 years, compared to aspirin alone,  
238 rivaroxaban did not reduce the rate of both arterial and SVG failure either as a combination with  
239 aspirin or as monotherapy. Additionally, the two rivaroxaban-based strategies did not reduce the  
240 risk of a composite of cardiovascular death, stroke, or myocardial infarction and increased the risk  
241 of bleeding at 30 days after CABG. Notably, when compared to aspirin alone, the combination of  
242 rivaroxaban and aspirin did not increase the rate of graft patency in both patients treated with on-  
243 pump and off-pump techniques. Conversely, rivaroxaban monotherapy improved the rate of graft  
244 patency in patients undergoing off-pump CABG (odds ratio 0.37; 95% CI, 0.16 to 0.82; p=0.01),  
245 but not in those undergoing on-pump CABG. Overall, these results do not support the use of

246 rivaroxaban, either alone or in a dual-pathway inhibition regimen, after CABG. Further studies are  
247 warranted to corroborate the promise of rivaroxaban in patients undergoing off-pump CABG.

248 **Parenteral anticoagulation** - Another approach to prevent early graft failure is the use of  
249 parenteral anticoagulants such as fondaparinux. In the Fonda-CABG study, 99 CABG patients on  
250 aspirin therapy were randomized to fondaparinux 2.5 mg/daily or heparin in the early postoperative  
251 in-hospital period [69]. After discharge and up to 30 days, the fondaparinux group continued to  
252 receive fondaparinux, while the heparin group received placebo. Computed tomography  
253 angiography performed at 30 days demonstrated similar rates of graft occlusion and no statistically  
254 significant difference in death, stroke, myocardial infarction, bleeding events, or re-operation.  
255 Although it was not adequately powered for efficacy, the trial showed no benefit of extended  
256 fondaparinux therapy compared with heparin for the prevention of early graft failure.

257

## 258 **GUIDELINES**

259 In the context of antithrombotic therapy for patients with CABG, the current guidelines on  
260 myocardial revascularization from the European Society of Cardiology (ESC) and the European  
261 Association for Cardio-Thoracic Surgery (EACTS) largely rely on the Focused Update on DAPT in  
262 Coronary Artery Disease published by the ESC in 2017 [8]. This document summarizes the findings  
263 of two meta-analyses comparing graft patency in patients receiving aspirin monotherapy versus  
264 DAPT with aspirin and clopidogrel [70, 71]. The majority of patients included in these meta-  
265 analyses had stable coronary artery disease, and both studies demonstrated a significant reduction in  
266 SVG occlusions with the use of DAPT. Nevertheless, given the low thrombotic risk after CABG in  
267 patients with stable coronary artery disease and the limited evidence, the guidelines do not generally  
268 recommend DAPT for preventing SVG in this setting [8].

269 In patients with ACS treated with DAPT and undergoing CABG, resumption of P2Y<sub>12</sub> inhibitor  
270 therapy as soon as deemed safe after surgery and continuation up to 12 months is recommended by

271 the ESC (class of recommendation I, level of evidence C) [8]. Additionally, the guidelines suggest  
272 that CABG patients at high ischemic risk and prior myocardial infarction, who have tolerated  
273 DAPT without experiencing bleeding complications, may be considered for treatment with DAPT  
274 for longer than 12 months and up to 36 months (class of recommendation IIb, level of evidence C)  
275 [72]. Conversely, in CABG patients with prior myocardial infarction who are at high risk of  
276 bleeding, discontinuation of P2Y<sub>12</sub> inhibitor therapy after six months should be considered (class of  
277 recommendation IIa, level of evidence C) [8].

278 Finally, current guidelines do not support the routine use of VKAs to prevent graft occlusion  
279 after CABG, unless other indications for long-term anticoagulation coexist (e.g., atrial fibrillation,  
280 venous thromboembolism, mechanical prosthetic valves) [73, 74].

281

## 282 **FUTURE DIRECTIONS**

283 The current evidence on antithrombotic therapy after CABG is characterized by diverse and  
284 sometimes contradictory findings. Several ongoing trials are actively addressing the unanswered  
285 questions regarding the optimal pharmacotherapy for this specific patient population (**Table 3**).

286 The ongoing TACSI (NCT03560310) trial is investigating whether DAPT with ticagrelor and  
287 aspirin reduces the risk of MACE at 12 months compared to aspirin alone in ACS patients  
288 undergoing CABG [75]. The CoCAP (NCT04783701) trial, an extension of TACSI, is assessing  
289 graft patency using computed tomography or coronary angiography at 12 to 32 months. The SDAT-  
290 IRC (NCT03789916) trial is examining the five-year efficacy of DAPT with ticagrelor and aspirin  
291 versus aspirin monotherapy in patients with incomplete revascularization. Additionally, as noted  
292 above, a follow-up extension of the DACAB trial (NCT03987373) will provide five-year outcomes  
293 of DAPT with ticagrelor and aspirin.

294 Two trials are focusing on short DAPT strategies. The TOP-CABG trial (NCT05380063) is  
295 comparing the non-inferiority of a three-month DAPT with ticagrelor and aspirin followed by

296 aspirin monotherapy to standard DAPT in preventing SVG occlusion and reducing the risk of  
297 bleeding [76]. The ODIN trial (announced) will evaluate the efficacy of one month of DAPT with  
298 aspirin plus ticagrelor followed by 11 months of aspirin monotherapy compared to aspirin alone in  
299 patients undergoing CABG for chronic coronary syndromes. These trials aim to provide evidence  
300 supporting the safe reduction of antithrombotic therapy duration and intensity, minimizing bleeding  
301 complications without compromising graft patency.

302

### 303 **CONCLUSIONS**

304 In this review, we explored the current evidence on antiplatelet and anticoagulant therapies for  
305 patients undergoing CABG. Early studies established aspirin as a key component of antithrombotic  
306 pharmacotherapy after CABG. Subsequent randomized controlled trials focused on adding a P2Y<sub>12</sub>  
307 inhibitor (such as clopidogrel, ticagrelor, or prasugrel) to aspirin, with conflicting results. In most  
308 studies, DAPT demonstrated significant benefits in reducing SVG occlusion and improving graft  
309 patency, particularly in patients with ACS. However, this benefit was accompanied by an increased  
310 risk of bleeding. Current guidelines support the use of DAPT for 12 months in ACS patients, but  
311 not in those with stable coronary artery disease. The use of oral anticoagulants is limited to patients  
312 with other indications for long-term anticoagulation.

313 Overall, the optimal antithrombotic regimen for patients undergoing CABG remains a subject of  
314 debate. Considering the evolving surgical techniques that minimize endothelial injury and promote  
315 early graft healing, the exploration of short-term DAPT regimens, akin to interventional cardiology,  
316 offers a potential balance between graft patency and bleeding risk. However, larger randomized  
317 studies, including ongoing clinical trials, are needed to provide more definitive evidence and  
318 guidance regarding antithrombotic therapies in this patient population. These studies will contribute  
319 to shaping the optimal antithrombotic strategies for patients undergoing CABG.

320 **Sources of funding**

321 None.

322

323 **Conflict of interest disclosures**

324 DC declares speaker's honoraria from Chiesi, Novo Nordisk, Sanofi and Terumo. All the other  
325 authors have no conflicts of interest to declare.

326

327 **Data availability statement**

328 No new data were generated or collected specifically for this review.

329

330 **FIGURE LEGEND**

331 **Figure 1 - Mechanisms of Graft Failure in CABG.** Graft failure in CABG is a complex process  
332 involving various pathophysiological mechanisms. Early, late, very late, and long-term graft  
333 failures can be attributed to distinct factors and processes.

334 **Figure 2 - Randomized clinical trials of antiplatelet therapy after CABG.** The figure presents a  
335 visual representation of randomized clinical trials investigating antiplatelet therapy following  
336 CABG.

337 **Table 1.** Randomized trials comparing monotherapy regimens after CABG.

| RCTs,<br>Year                    | Sample<br>size | Interventional arm                                   | Control arm                | Follow-<br>up | Primary efficacy endpoint                                                                                                                                                                                                            | Primary safety endpoint                                                                                                                                          |
|----------------------------------|----------------|------------------------------------------------------|----------------------------|---------------|--------------------------------------------------------------------------------------------------------------------------------------------------------------------------------------------------------------------------------------|------------------------------------------------------------------------------------------------------------------------------------------------------------------|
| <b>David JL et al.,<br/>1999</b> | 62             | Clopidogrel (C) 50 mg/die or 75 mg/die or 100 mg/die | Ticlopidine (T) 250 mg/bid | 28 days       | Ex-vivo platelet aggregation:<br>Day 9: inhibition in the T group but not in the C groups (p<0.01);<br>Day 28: equally significant inhibition in the T, C100 and C75 groups (p<0.001) and at a less extent in the C50 group (p<0.01) | BT was significantly prolonged versus baseline in the T, C100 and C75 (p<0.001). The prolongation was significant but at a less extent in the C50 group (p<0.05) |
| <b>Lim E. et al.,<br/>2004</b>   | 54             | Clopidogrel (C) 75 mg/die                            | ASA (A) 100 mg or 325 mg   | 5 days        | Mean percentage aggregations with collagen: 56% for A and 99% for C; mean difference between the two arms was 42% (95% CI, 27% - 56%) in favor of A                                                                                  | NA                                                                                                                                                               |
| <b>TiCAB,<br/>2019</b>           | 1,859          | Ticagrelor (T) 90 mg/bid                             | ASA (A) 100 mg/die         | 12 months     | Composite of cardiovascular death, MI, repeat revascularization, and stroke: HR 1.19; 95% CI 0.87 to 1.62; p=0.28                                                                                                                    | BARC $\geq$ 4 for periprocedural and hospital stay-related bleedings and BARC $\geq$ 3 for post-discharge bleedings: HR 1.17; 95% CI 0.71 to 1.92; p=0.53        |
| <b>TARGET,<br/>2022</b>          | 250            | Ticagrelor (T) 90 mg/bid                             | ASA (A) 81 mg/bid          | 12 months     | SVG occlusion: 13.2% vs 17.4%; p=0.30                                                                                                                                                                                                | Freedom from major adverse cardiovascular events; p=0.60                                                                                                         |

338 **Abbreviations:** ASA, aspirin; BARC, Bleeding Academic Research Consortium; BID, bis in die; BT, bleeding time; CI confidence interval; HR, hazard ratio; MI, myocardial  
339 infarction; NA, not available; SVG, saphenous vein graft.

340

**Table 2.** Randomized clinical trials of dual versus single antiplatelet strategies after CABG.

| RCTs, Year                       | Sample size | N grafts | Graft type                 | Interventional arm                                           | Control arm             | Follow-up | Graft assessment method        | Graft occlusion (any grafts, %) | SVGs occlusion (%)    |
|----------------------------------|-------------|----------|----------------------------|--------------------------------------------------------------|-------------------------|-----------|--------------------------------|---------------------------------|-----------------------|
| <b>Gao G. et al., 2010</b>       | 249         | 704      | SVGs (68%), LIMA, RA       | ASA 100 mg plus clopidogrel 75 mg                            | ASA 100 mg              | 3 months  | CTA                            | 6.5 vs 10.3 (p=0.07)            | 8.4 vs 14.3 (p=0.04)  |
| <b>Mujanovic E. et al., 2009</b> | 20          | 56       | SVGs (64%), LIMA           | ASA 100 mg plus clopidogrel 75 mg                            | ASA 100 mg              | 3 months  | Coronary angiography           | 6.9 vs 29.6 (p=0.04)            | 10.5 vs 47.1 (p=0.02) |
| <b>CRYSSA, 2012</b>              | 300         | 960      | SVGs (57%), LIMA, RIMA, RA | ASA 100 mg plus clopidogrel 75 mg                            | ASA 100 mg              | 12 months | CTA                            | 4.84 vs 8.35 (p=0.03)           | 7.4 vs 13.1 (p=0.04)  |
| <b>Sun J.C.J. et al., 2010</b>   | 100         | 395      | SVGs (58%), LIMA, RIMA, RA | ASA 81 mg plus clopidogrel 75 mg                             | ASA 81 mg plus placebo  | 1 months  | CTA                            | 5.0 vs 7.1 (p=0.43)             | 6.5 vs 6.8 (p=0.92)   |
| <b>CASCADE, 2010</b>             | 113         | NA       | SVGs and arterial grafts   | ASA 162 mg plus clopidogrel 75 mg                            | ASA 162 mg plus placebo | 12 months | Coronary angiography with IVUS | 4.8 vs 4.5 (p=0.90)             | 5.7 vs 6.8 (p=0.69)   |
| <b>TEG-CABG, 2017</b>            | 165         | 355      | SVGs (58%), LIMA, RIMA, RA | ASA 75 mg plus clopidogrel 75 mg                             | ASA 75 mg               | 3 months  | CTA                            | 25.7 vs 22.4 (p=0.84)*          | 11.9 vs 6.7 (p=0.29)  |
| <b>TAP-CABG, 2016</b>            | 70          | 207      | SVGs (48%) LIMA, RA        | ASA 81 mg plus ticagrelor 90 mg bid                          | ASA 81 mg plus placebo  | 3 months  | CTA                            | 10.3 vs 18.3 (p=0.11)           | 10.0 vs 22.0 (p=0.12) |
| <b>DACAB, 2018</b>               | 500         | 1891     | SVGs (77%), LIMA, RA       | Ticagrelor 90 mg bid or ASA 100 mg plus ticagrelor 90 mg bid | ASA 100 mg              | 12 months | CTA or coronary angiography    | NA                              | 17.2 vs 23.5 (p=0.10) |

|                                |     |      |                            |                                              |                                   |           |                                              |                        |                           |
|--------------------------------|-----|------|----------------------------|----------------------------------------------|-----------------------------------|-----------|----------------------------------------------|------------------------|---------------------------|
|                                |     |      |                            |                                              |                                   |           |                                              |                        | 11.3 vs 23.5<br>(p<0.001) |
| <b>POPULAR-CABG, 2020</b>      | 499 | 1847 | SVGs (58%), LIMA, RIMA, RA | ASA (100 or 80 mg) plus ticagrelor 90 mg bid | ASA (100 or 80 mg) plus placebo   | 12 months | CTA                                          | NA                     | 9.6 vs 10.1<br>(p=0.64)   |
| <b>Danek B.A. et al., 2020</b> | 84  | NA   | SVGs                       | ASA 100 mg plus prasugrel 10 mg/die          | ASA 100 mg plus placebo           | 12 months | Coronary angiography with OCT, IVUS and NIRS | NA                     | p=0.06                    |
| <b>Tang Y. Et al., 2021</b>    | 147 | 480  | SVGs (70%), LIMA           | ASA 100 mg plus ticagrelor 90 mg bid         | ASA 100 mg plus clopidogrel 75 mg | 12 months | CTA                                          | 6.7 vs 7.5<br>(p=0.73) | 9.0 vs 10.1<br>(p=0.75)   |
| <b>Bai C. et al., 2022</b>     | 152 | 540  | SVGs (75%) and LIMA        | Indobufen 100 mg bid plus clopidogrel 75 mg  | ASA 100 mg plus clopidogrel 75 mg | 12 months | CTA or coronary angiography                  | 4.9 vs 7.4<br>(p=0.22) | 5.5 vs 8.7<br>(p=0.21)    |

342 **Abbreviations:** ASA, aspirin; BID, bis in die; CTA, computed tomography angiography; IVUS, intravascular ultrasound; LIMA, left internal mammary artery; NA, not  
343 available; NIRS, near-infrared spectroscopy; OCT, optical coherence tomography; SVG, saphenous vein graft; RA, radial artery; RIMA, right internal mammary artery. \*Rate of  
344 significant stenosis (>50%) or occlusions.

345

346 **Table 3.** Ongoing randomized clinical trials of antithrombotic strategies after CABG.

| <b>Trial name,<br/>NCT</b>      | <b>Sample<br/>size</b> | <b>Population</b>                             | <b>Interventional arm</b>                                                                    | <b>Control arm</b>      | <b>Primary endpoint</b>                   | <b>Follow-up</b> | <b>Estimated study<br/>completion</b> |
|---------------------------------|------------------------|-----------------------------------------------|----------------------------------------------------------------------------------------------|-------------------------|-------------------------------------------|------------------|---------------------------------------|
| <b>TACSI,</b><br>NCT03560310    | 2200                   | CABG in acute<br>coronary syndromes           | Ticagrelor plus aspirin                                                                      | Aspirin                 | MACE                                      | 12 months        | 2031                                  |
| <b>CoCAP,</b><br>NCT04783701    | 360                    | CABG in acute<br>coronary syndromes           | Ticagrelor plus aspirin                                                                      | Aspirin                 | Graft patency                             | 12-36<br>months  | 2025                                  |
| <b>SDAT-IRC,</b><br>NCT03789916 | 800                    | Incomplete<br>revascularization after<br>CABG | Ticagrelor plus aspirin                                                                      | Aspirin                 | Cardiovascular death                      | 5 years          | 2024                                  |
| <b>TOP-CABG,</b><br>NCT05380063 | 2300                   | CABG with SVG $\geq 1$                        | Aspirin plus ticagrelor<br>for 3 months, followed<br>by aspirin plus<br>placebo for 9 months | Aspirin plus ticagrelor | SVGs occlusion,<br>bleeding BARC $\geq 2$ | 12 months        | 2025                                  |
| <b>ODIN (announced)</b>         | 700                    | CABG in chronic<br>coronary syndromes         | Aspirin plus ticagrelor<br>for 1 month, followed<br>by aspirin alone for 11<br>months        | Aspirin                 | Not available                             | Not<br>available | Not available                         |

347 **Abbreviations:** BARC, Bleeding Academic Research Consortium; CABG, coronary artery bypass graft; MACE, major adverse cardiac events; SVG, saphenous vein graft.

## 348 REFERENCES

- 349 1. Doenst, T., et al., *PCI and CABG for Treating Stable Coronary Artery Disease: JACC Review Topic*  
350 *of the Week*. J Am Coll Cardiol, 2019. **73**(8): p. 964-976.
- 351 2. Fitzgibbon, G.M., et al., *Coronary bypass graft fate and patient outcome: angiographic follow-up of*  
352 *5,065 grafts related to survival and reoperation in 1,388 patients during 25 years*. J Am Coll  
353 Cardiol, 1996. **28**(3): p. 616-26.
- 354 3. Guida, G.A. and G.D. Angelini, *Pathophysiology and Mechanisms of Saphenous Vein Graft Failure*.  
355 Braz J Cardiovasc Surg, 2022. **37**(Spec 1): p. 32-37.
- 356 4. Murphy, G.J. and G.D. Angelini, *Insights into the pathogenesis of vein graft disease: lessons from*  
357 *intravascular ultrasound*. Cardiovascular Ultrasound, 2004. **2**(1): p. 8.
- 358 5. Motwani, J.G. and E.J. Topol, *Aortocoronary saphenous vein graft disease: pathogenesis,*  
359 *predisposition, and prevention*. Circulation, 1998. **97**(9): p. 916-31.
- 360 6. Yang, Z., et al., *Different effects of thrombin receptor activation on endothelium and smooth muscle*  
361 *cells of human coronary bypass vessels. Implications for venous bypass graft failure*. Circulation,  
362 1997. **95**(7): p. 1870-6.
- 363 7. Sopek-Merkaš, I., et al., *ANTIPLATELET THERAPY AFTER CORONARY ARTERY BYPASS*  
364 *GRAFT SURGERY - UNEVENNESS OF DAILY CLINICAL PRACTICE*. Acta Clin Croat, 2022.  
365 **60**(3): p. 540-543.
- 366 8. Valgimigli, M., et al., *2017 ESC focused update on dual antiplatelet therapy in coronary artery*  
367 *disease developed in collaboration with EACTS*. Eur J Cardiothorac Surg, 2018. **53**(1): p. 34-78.
- 368 9. Cheung-Flynn, J., et al., *Limiting Injury During Saphenous Vein Graft Preparation For Coronary*  
369 *Arterial Bypass Prevents Metabolic Decompensation*. Scientific Reports, 2017. **7**(1): p. 14179.
- 370 10. Osgood, M.J., et al., *Surgical vein graft preparation promotes cellular dysfunction, oxidative stress,*  
371 *and intimal hyperplasia in human saphenous vein*. J Vasc Surg, 2014. **60**(1): p. 202-11.
- 372 11. Weaver, H., et al., *Oxidative stress and vein graft failure: a focus on NADH oxidase, nitric oxide and*  
373 *eicosanoids*. Curr Opin Pharmacol, 2012. **12**(2): p. 160-5.
- 374 12. de Vries, M.R., et al., *Vein graft failure: from pathophysiology to clinical outcomes*. Nat Rev  
375 Cardiol, 2016. **13**(8): p. 451-70.
- 376 13. Gluckman, T.J., et al., *Effects of aspirin responsiveness and platelet reactivity on early vein graft*  
377 *thrombosis after coronary artery bypass graft surgery*. J Am Coll Cardiol, 2011. **57**(9): p. 1069-77.
- 378 14. McEnany, M.T., et al., *The effect of antithrombotic therapy on patency rates of saphenous vein*  
379 *coronary artery bypass grafts*. J Thorac Cardiovasc Surg, 1982. **83**(1): p. 81-9.
- 380 15. Sharma, G.V., et al., *The effect of antiplatelet therapy on saphenous vein coronary artery bypass*  
381 *graft patency*. Circulation, 1983. **68**(3 Pt 2): p. Ii218-21.
- 382 16. Lorenz, R.L., et al., *Improved aortocoronary bypass patency by low-dose aspirin (100 mg daily).*  
383 *Effects on platelet aggregation and thromboxane formation*. Lancet, 1984. **1**(8389): p. 1261-4.
- 384 17. Meister, W., et al., *Low-dose acetylsalicylic acid (100 mg/day) after aortocoronary bypass surgery:*  
385 *a placebo-controlled trial*. Br J Clin Pharmacol, 1984. **17**(6): p. 703-11.
- 386 18. Gavaghan, T.P., V. GebSKI, and D.W. Baron, *Immediate postoperative aspirin improves vein graft*  
387 *patency early and late after coronary artery bypass graft surgery. A placebo-controlled, randomized*  
388 *study*. Circulation, 1991. **83**(5): p. 1526-33.
- 389 19. Goldman, S., et al., *Improvement in early saphenous vein graft patency after coronary artery bypass*  
390 *surgery with antiplatelet therapy: results of a Veterans Administration Cooperative Study*.  
391 Circulation, 1988. **77**(6): p. 1324-32.
- 392 20. Ivert, T., et al., *Platelet function one and three months after coronary bypass surgery in relation to*  
393 *once or twice daily dosing of acetylsalicylic acid*. Thromb Res, 2017. **149**: p. 64-69.
- 394 21. Paikin, J.S., et al., *Once versus twice daily aspirin after coronary bypass surgery: a randomized*  
395 *trial*. J Thromb Haemost, 2017. **15**(5): p. 889-896.
- 396 22. Paikin, J.S., et al., *Multiple daily doses of acetyl-salicylic acid (ASA) overcome reduced platelet*  
397 *response to once-daily ASA after coronary artery bypass graft surgery: a pilot randomized*  
398 *controlled trial*. J Thromb Haemost, 2015. **13**(3): p. 448-56.
- 399 23. Rajah, S.M., et al., *Effects of antiplatelet therapy with indobufen or aspirin-dipyridamole on graft*  
400 *patency one year after coronary artery bypass grafting*. J Thorac Cardiovasc Surg, 1994. **107**(4): p.  
401 1146-53.
- 402 24. Fuster, V., et al., *Aspirin as a therapeutic agent in cardiovascular disease. Special Writing Group*.  
403 Circulation, 1993. **87**(2): p. 659-75.

- 404 25. Mangano, D.T., *Aspirin and Mortality from Coronary Bypass Surgery*. New England Journal of  
405 Medicine, 2002. **347**(17): p. 1309-1317.
- 406 26. Gaudino, M., et al., *Mechanisms, Consequences, and Prevention of Coronary Graft Failure*.  
407 Circulation, 2017. **136**(18): p. 1749-1764.
- 408 27. Arazi, H.C., et al., *Impaired anti-platelet effect of aspirin, inflammation and platelet turnover in  
409 cardiac surgery*☆☆☆. Interactive CardioVascular and Thoracic Surgery, 2010. **10**(6): p. 863-867.
- 410 28. *A randomised, blinded, trial of clopidogrel versus aspirin in patients at risk of ischaemic events  
411 (CAPRIE)*. The Lancet, 1996. **348**(9038): p. 1329-1339.
- 412 29. Bhatt, D.L., et al., *Superiority of clopidogrel versus aspirin in patients with prior cardiac surgery*.  
413 Circulation, 2001. **103**(3): p. 363-8.
- 414 30. David, J.L. and R. Limet, *Antiplatelet activity of clopidogrel in coronary artery bypass graft surgery  
415 patients*. Thromb Haemost, 1999. **82**(5): p. 1417-21.
- 416 31. Lim, E., et al., *Clopidogrel did not inhibit platelet function early after coronary bypass surgery: A  
417 prospective randomized trial*. J Thorac Cardiovasc Surg, 2004. **128**(3): p. 432-5.
- 418 32. Schunkert, H., et al., *Randomized trial of ticagrelor vs. aspirin in patients after coronary artery  
419 bypass grafting: the TiCAB trial*. Eur Heart J, 2019. **40**(29): p. 2432-2440.
- 420 33. Kulik, A., et al., *Ticagrelor versus aspirin and vein graft patency after coronary bypass: A  
421 randomized trial*. Journal of Cardiac Surgery, 2022. **37**(3): p. 563-570.
- 422 34. Kulik, A., et al., *Ticagrelor versus aspirin 2 years after coronary bypass: Observational analysis  
423 from the TARGET trial*. Journal of Cardiac Surgery, 2022. **37**(7): p. 1969-1977.
- 424 35. Gao, G., et al., *Aspirin plus clopidogrel therapy increases early venous graft patency after coronary  
425 artery bypass surgery a single-center, randomized, controlled trial*. J Am Coll Cardiol, 2010.  
426 **56**(20): p. 1639-43.
- 427 36. Mujanovic, E., et al., *The effect of combined clopidogrel and aspirin therapy after off-pump  
428 coronary surgery: a pilot study*. Innovations (Phila), 2009. **4**(5): p. 265-8.
- 429 37. Mannacio, V.A., et al., *Aspirin plus clopidogrel for optimal platelet inhibition following off-pump  
430 coronary artery bypass surgery: results from the CRYSSA (prevention of Coronary arteRY bypaSS  
431 occlusion After off-pump procedures) randomised study*. Heart, 2012. **98**(23): p. 1710-5.
- 432 38. Kayacioglu, I., et al., *The role of clopidogrel and acetylsalicylic acid in the prevention of early-  
433 phase graft occlusion due to reactive thrombocytosis after coronary artery bypass operation*. Heart  
434 Surg Forum, 2008. **11**(3): p. E152-7.
- 435 39. Sun, J.C., et al., *Randomized trial of aspirin and clopidogrel versus aspirin alone for the prevention  
436 of coronary artery bypass graft occlusion: the Preoperative Aspirin and Postoperative Antiplatelets  
437 in Coronary Artery Bypass Grafting study*. Am Heart J, 2010. **160**(6): p. 1178-84.
- 438 40. Kulik, A., et al., *Aspirin plus clopidogrel versus aspirin alone after coronary artery bypass grafting:  
439 the clopidogrel after surgery for coronary artery disease (CASCADE) Trial*. Circulation, 2010.  
440 **122**(25): p. 2680-7.
- 441 41. Rafiq, S., et al., *Thrombelastographic hypercoagulability and antiplatelet therapy after coronary  
442 artery bypass surgery (TEG-CABG trial): a randomized controlled trial*. Platelets, 2017. **28**(8): p.  
443 786-793.
- 444 42. Ebrahimi, R., et al., *Effect of clopidogrel use post coronary artery bypass surgery on graft patency*.  
445 Ann Thorac Surg, 2014. **97**(1): p. 15-21.
- 446 43. Fox, K.A., et al., *Benefits and risks of the combination of clopidogrel and aspirin in patients  
447 undergoing surgical revascularization for non-ST-elevation acute coronary syndrome: the  
448 Clopidogrel in Unstable angina to prevent Recurrent ischemic Events (CURE) Trial*. Circulation,  
449 2004. **110**(10): p. 1202-8.
- 450 44. Qu, J., et al., *Dual Antiplatelet Therapy with Clopidogrel and Aspirin Versus Aspirin Monotherapy  
451 in Patients Undergoing Coronary Artery Bypass Graft Surgery*. J Am Heart Assoc, 2021. **10**(11): p.  
452 e020413.
- 453 45. Ebrahimi, R., et al., *Comparison of Outcomes and Costs Associated With Aspirin ± Clopidogrel After  
454 Coronary Artery Bypass Grafting*. Am J Cardiol, 2018. **121**(6): p. 709-714.
- 455 46. Gasparovic, H., et al., *Impact of Dual Antiplatelet Therapy on Outcomes Among Aspirin-Resistant  
456 Patients Following Coronary Artery Bypass Grafting*. American Journal of Cardiology, 2014.  
457 **113**(10): p. 1660-1667.

- 458 47. van Diepen, S., et al., *Dual Antiplatelet Therapy Versus Aspirin Monotherapy in Diabetics With*  
459 *Multivessel Disease Undergoing CABG: FREEDOM Insights*. J Am Coll Cardiol, 2017. **69**(2): p.  
460 119-127.
- 461 48. Saw, J., et al., *Ticagrelor and aspirin for the prevention of cardiovascular events after coronary*  
462 *artery bypass graft surgery*. Heart, 2016. **102**(10): p. 763-9.
- 463 49. Zhao, Q., et al., *Effect of Ticagrelor Plus Aspirin, Ticagrelor Alone, or Aspirin Alone on Saphenous*  
464 *Vein Graft Patency 1 Year After Coronary Artery Bypass Grafting: A Randomized Clinical Trial*.  
465 *Jama*, 2018. **319**(16): p. 1677-1686.
- 466 50. Willemsen, L.M., et al., *Effect of Adding Ticagrelor to Standard Aspirin on Saphenous Vein Graft*  
467 *Patency in Patients Undergoing Coronary Artery Bypass Grafting (POPular CABG): A*  
468 *Randomized, Double-Blind, Placebo-Controlled Trial*. Circulation, 2020. **142**(19): p. 1799-1807.
- 469 51. Sandner, S., et al., *Association of Dual Antiplatelet Therapy With Ticagrelor With Vein Graft Failure*  
470 *After Coronary Artery Bypass Graft Surgery: A Systematic Review and Meta-analysis*. JAMA, 2022.  
471 **328**(6): p. 554-562.
- 472 52. von Scheidt, M., et al., *Ticagrelor-based antiplatelet regimens in patients treated with coronary*  
473 *artery bypass grafting: a meta-analysis of randomized controlled trials*. Eur J Cardiothorac Surg,  
474 2020. **57**(3): p. 520-528.
- 475 53. Danek, B.A., et al., *A Randomized Controlled Trial of Prasugrel for Prevention of Early Saphenous*  
476 *Vein Graft Thrombosis*. J Invasive Cardiol, 2020. **32**(12): p. E305-E312.
- 477 54. Gupta, S., et al., *Antiplatelet therapy and coronary artery bypass grafting: a systematic review and*  
478 *network meta-analysis*. Interact Cardiovasc Thorac Surg, 2020. **31**(3): p. 354-363.
- 479 55. Solo, K., et al., *Antithrombotic treatment after coronary artery bypass graft surgery: systematic*  
480 *review and network meta-analysis*. BMJ, 2019. **367**: p. 15476.
- 481 56. Held, C., et al., *Ticagrelor versus clopidogrel in patients with acute coronary syndromes undergoing*  
482 *coronary artery bypass surgery: results from the PLATO (Platelet Inhibition and Patient Outcomes)*  
483 *trial*. J Am Coll Cardiol, 2011. **57**(6): p. 672-84.
- 484 57. Xu, F., et al., *Antiplatelet effects of ticagrelor versus clopidogrel after coronary artery bypass graft*  
485 *surgery: A single-center randomized controlled trial*. J Thorac Cardiovasc Surg, 2019. **158**(2): p.  
486 430-437 e4.
- 487 58. Tang, Y., et al., *Aspirin plus ticagrelor or clopidogrel on graft patency one year after coronary*  
488 *bypass grafting: a single-center, randomized, controlled trial*. J Thorac Dis, 2021. **13**(3): p. 1697-  
489 1705.
- 490 59. Smith, P.K., et al., *Mortality benefit with prasugrel in the TRITON-TIMI 38 coronary artery bypass*  
491 *grafting cohort: risk-adjusted retrospective data analysis*. J Am Coll Cardiol, 2012. **60**(5): p. 388-  
492 96.
- 493 60. Bai, C., et al., *[A randomized controlled trial of indobufen versus aspirin in the prevention of*  
494 *bridging restenosis after coronary artery bypass grafting]*. Zhonghua Xin Xue Guan Bing Za Zhi,  
495 2022. **50**(5): p. 466-470.
- 496 61. *Optimal antithrombotic therapy following aortocoronary bypass: a meta-analysis*. European Journal  
497 of Cardio-Thoracic Surgery, 1993. **7**(4): p. 169-180.
- 498 62. van der Meer, J., et al., *Prevention of one-year vein-graft occlusion after aortocoronary- bypass*  
499 *surgery: a comparison of low-dose aspirin, low-dose aspirin plus dipyridamole, and oral*  
500 *anticoagulants*. The Lancet, 1993. **342**(8866): p. 257-264.
- 501 63. *The Effect of Aggressive Lowering of Low-Density Lipoprotein Cholesterol Levels and Low-Dose*  
502 *Anticoagulation on Obstructive Changes in Saphenous-Vein Coronary-Artery Bypass Grafts*. New  
503 England Journal of Medicine, 1997. **336**(3): p. 153-163.
- 504 64. Knatterud, G.L., et al., *Long-Term Effects on Clinical Outcomes of Aggressive Lowering of Low-*  
505 *Density Lipoprotein Cholesterol Levels and Low-Dose Anticoagulation in the Post Coronary Artery*  
506 *Bypass Graft Trial*. Circulation, 2000. **102**(2): p. 157-165.
- 507 65. Capodanno, D., et al., *Dual-pathway inhibition for secondary and tertiary antithrombotic prevention*  
508 *in cardiovascular disease*. Nature Reviews Cardiology, 2020. **17**(4): p. 242-257.
- 509 66. Mega, J.L., et al., *Rivaroxaban in patients with a recent acute coronary syndrome*. N Engl J Med,  
510 2012. **366**(1): p. 9-19.
- 511 67. Alexander, J.H., et al., *Apixaban with antiplatelet therapy after acute coronary syndrome*. N Engl J  
512 Med, 2011. **365**(8): p. 699-708.

- 513 68. Lamy, A., et al., *Rivaroxaban, Aspirin, or Both to Prevent Early Coronary Bypass Graft Occlusion: The COMPASS-CABG Study*. Journal of the American College of Cardiology, 2019. **73**(2): p. 121-130.
- 514
- 515
- 516 69. Sun, J.C., et al., *Randomized trial of fondaparinux versus heparin to prevent graft failure after coronary artery bypass grafting: the Fonda CABG study*. J Thromb Thrombolysis, 2011. **32**(3): p. 378-85.
- 517
- 518
- 519 70. Deo, S.V., et al., *Dual anti-platelet therapy after coronary artery bypass grafting: is there any benefit? A systematic review and meta-analysis*. J Card Surg, 2013. **28**(2): p. 109-16.
- 520
- 521 71. Nocerino, A.G., S. Achenbach, and A.J. Taylor, *Meta-analysis of effect of single versus dual antiplatelet therapy on early patency of bypass conduits after coronary artery bypass grafting*. Am J Cardiol, 2013. **112**(10): p. 1576-9.
- 522
- 523
- 524 72. Neumann, F.J., et al., *2018 ESC/EACTS Guidelines on myocardial revascularization*. Eur Heart J, 2019. **40**(2): p. 87-165.
- 525
- 526 73. Sousa-Uva, M., et al., *2017 EACTS Guidelines on perioperative medication in adult cardiac surgery*. Eur J Cardiothorac Surg, 2018. **53**(1): p. 5-33.
- 527
- 528 74. Kulik, A., et al., *Secondary Prevention After Coronary Artery Bypass Graft Surgery*. Circulation, 2015. **131**(10): p. 927-964.
- 529
- 530 75. Malm, C.J., et al., *Dual or single antiplatelet therapy after coronary surgery for acute coronary syndrome (TACSI trial): Rationale and design of an investigator-initiated, prospective, multinational, registry-based randomized clinical trial*. Am Heart J, 2023. **259**: p. 1-8.
- 531
- 532
- 533 76. Yuan, X., et al., *Multicentre, randomised, double-blind, parallel controlled trial to investigate timing of platelet inhibition after coronary artery bypass grafting: TOP-CABG trial study*. BMJ Open, 2023. **13**(6): p. e070823.
- 534
- 535
- 536
- 537
